1  
2 **Fatty acid composition and parasitism of European sardine (*Sardina pilchardus*) and**  
3 **European anchovy (*Engraulis encrasicolus*) populations in the northern Catalan Sea**  
4 **in the context of changing environmental conditions**

5  
6 Sebastian Biton-Porsmoguer<sup>1</sup>, Ricard Bou<sup>2</sup>, Elsa Lloret<sup>2</sup>, Manuel Alcaide<sup>1</sup>, Josep Lloret<sup>1\*</sup>

7  
8 <sup>1</sup>University of Girona, Institute of Aquatic Ecology, Oceans and Human Health Chair,  
9 Faculty of Sciences, C/ Maria Aurèlia Capmany 69, E-17003 Girona, Catalonia, Spain.

10  
11 <sup>2</sup>Institut de Recerca i Tecnologia Agroalimentàries (IRTA), Food Technology, Finca  
12 Camps i Armet s/n, E-17121 Monells, Catalonia, Spain.

13  
14 \*Corresponding author: [josep.lloret@udg.edu](mailto:josep.lloret@udg.edu); <https://orcid.org/0000-0002-3917-1152>

15  
16 **Abstract**

17  
18 The status of sardine and anchovy populations in the northern Mediterranean Sea has been  
19 declining in recent decades. In this study, fatty acids and parasitism at different  
20 reproductive and feeding stages in these two species were assessed using specimens  
21 caught along the northern Catalan coast, in order to assess the links between lipid  
22 dynamics, reproduction and feeding in these two species, and to contribute towards an  
23 explanation of the potential causes of the current situation of the stocks. The results  
24 support the use of fatty acid levels as indicators of the body condition of sardine and  
25 anchovy at different reproductive and feeding stages, as well as that of the pelagic  
26 environmental conditions. In particular, the relatively low n-3 PUFA levels (which are  
27 crucial for reproductive success) found in spawning sardines compared to spawning  
28 anchovies indicate a poorer reproductive health status of sardine. By comparing the  
29 current total lipid content values with those recorded in other Mediterranean and North  
30 Atlantic areas, and, others from more than ten years ago, in the adjacent area of the Gulf  
31 of Lion, our study reveals the persistent poor condition of sardine and anchovy in the  
32 northern Catalan Sea. Furthermore, the low levels of diatom fatty acid markers observed  
33 throughout the spawning and non-spawning seasons in both sardine and anchovy, indicate  
34 a diet poor in diatoms. Moreover, the results indicate that it is very unlikely that parasitism  
35 is a significant factor in the decline in condition of sardine and anchovy in the northern  
36 Catalan Sea. In fact, the results suggest that the current poor condition of sardine and  
37 anchovy in the northern Catalan Sea has been exacerbated by a decrease in plankton  
38 productivity and/or a shift in the taxonomic composition of phytoplankton communities,  
39 adding to the ongoing effects of overfishing.

40  
41  
42 **Key-Words** Small pelagic fish - Fatty acids - Parasitism – Sea warming – Pelagic  
43 environment

46

47

## 48 **Introduction**

49

50 Substantial declines in the stock size, mean body size and/or condition of European  
51 sardine (*Sardina pilchardus*) and European anchovy (*Engraulis encrasicolus*) have been  
52 observed in the north-western Mediterranean Sea since 2009 (Van Beveren et al. 2014;  
53 Brosset et al. 2015, 2016a; 2017; Ferrer-Maza et al. 2016, Albó-Puigserver et al. 2017,  
54 2019; Saraux et al. 2019), resulting in profound changes in the structure of the stocks and  
55 a major decline in the landings and fishing activity (Coll and Bellido 2019; Brosset et al.  
56 2017; Saraux et al. 2019). Similar negative trends in the body condition of sardine and  
57 anchovy have been documented in other northern areas of the Mediterranean Sea (Brosset  
58 et al. 2017) and for sardine in the Bay of Biscay in the North Atlantic (Veron et al. 2020).  
59 The current status of sardine and anchovy stocks is worrying as these small pelagic  
60 species are not only important to fisheries, they are also important from an ecological  
61 point of view, as they have a central place in the food web as forage species (Saraux et  
62 al. 2019; Albó-Puigserver et al. 2019). Forage fish play a fundamental role in marine  
63 trophodynamics because they uptake the energy available from low-level plankton and  
64 provide higher-order predators, including marine mammals, seabirds, large piscivorous  
65 fish and humans, with a highly nutritious and energetic food source (Cury et al. 2000).  
66 Hence, changes in body condition in these small pelagic fish can have important  
67 implications for the whole ecosystem structure (Pethybridge et al. 2014; Albó-Puigserver  
68 et al. 2017, 2019; Saraux et al. 2019).

69

70 Overfishing, climate change, diseases, predation by large fish such as tuna, and  
71 competition between pelagic organisms for the zooplankton they feed on, have all been  
72 suggested as factors to explain the decline in abundance and mean weight of sardine and  
73 anchovy populations in the Gulf of Lion. It seems, however, that the combined effects of  
74 poor condition, slower growth and the disappearance of older and larger individuals  
75 mediated by potential changes in food availability have been the major causes (Saraux et  
76 al. 2014, Van Beveren et al. 2014; Saraux et al. 2019). In the NW Mediterranean, anchovy  
77 feed on zooplankton (particularly large copepods) whereas sardine feed on both  
78 zooplankton (mainly large copepods) and phytoplankton (mainly diatoms) (Plounevez  
79 and Champalbert (2000), Costalgo and Palomera (2014); Le Bourg et al. (2015).  
80 However, recent studies have suggested a shift in the diet of sardines in the Gulf of Lion  
81 from larger mesozooplankton (with a high proportion of cladocerans) before 2008 to  
82 smaller prey (copepods, suspected to be less nutritious) in the early 2010s (Zarubin et al.  
83 2014; Brosset et al. 2016b). Furthermore, an experimental study carried out in the Gulf  
84 of Lion showed that food size is as important as food quantity for body condition, growth  
85 and total lipids of sardines (Queirós et al. 2019). A combination of pollution and sea  
86 warming may have resulted in a long-lasting domination of smaller, lower-energy  
87 plankton in this region, which could be extremely detrimental to sardine populations  
88 (Queirós et al. 2019). Overall, plankton composition, concentration and size seem to play  
89 a key role in determining the condition of small pelagic fish as other studies have shown:  
90 anchovy in the Strait of Sicily (Basilone et al. 2004, 2006) and in the Adriatic (Zorica et  
91 al. 2013), sprat in the Black Sea (Shulman et al. 2005) and sardine in the Bay of Biscay  
92 (Veron et al. 2020). In the Bay of Biscay, the decline in body condition in sardine since  
93 the late 2000s had no apparent link with fishing pressure but instead was linked to trophic  
94 responses involving a potential shift in the timing of the secondary production and/or the  
95 quality of the food (Veron et al. 2020).

96

97         Assessing fatty acid composition in forage fish is seen as an ideal way to  
98 understand variability in their population dynamics (Shulman et al. 2005; Litzow et al.  
99 2006; Lloret et al. 2014; Pethybridge et al. 2014; Keinänen et al. 2017). In addition, fatty  
100 acid composition can be used to monitor energy availability and energy transfer in a food  
101 web, because it is known to reflect the fatty acid content of the fish diet, and, ultimately,  
102 of local phytoplankton (St. John and Lund 1996; Litzow et al. 2006), and to determine  
103 the flow-on effects of these observed changes to their predators, because lipid content in  
104 forage fish is likely to have a large influence on higher-order secondary production (Lloret  
105 et al. 2014; Pethybridge et al. 2014; Keinänen et al. 2017).

106

107         Fatty acids are relevant from a nutritional point of view because they serve as  
108 substrates for a number of important metabolic energy and maintenance processes that  
109 underlie essential life history traits of fish, such as reproduction, growth and development.  
110 Fatty acids are the most important components of lipids, defining their energy value and  
111 forming the structural–metabolic “skeleton” of cellular and subcellular membranes. In  
112 particular, polyunsaturated fatty acids (PUFAs) – among which are the omega 3 fatty  
113 acids, such as eicosapentaenoic acid (EPA) and docosahexaenoic acid (DHA), and the  
114 omega 6 fatty acids, such as arachidonic acid (ARA) – are fundamental components of  
115 membranes and are regarded as essential for ion transport and for regulating the viscosity  
116 of membranes, as they provide osmotic and electrolytic homeostasis and membrane  
117 permeability (Lloret et al. 2014). In addition, PUFAs have been identified as a major  
118 dietary factor in determining successful reproduction of fish, being crucial for the future  
119 requirements of the progeny (Tocher 2003; Lloret et al. 2014). They affect hatching  
120 success and viability of larvae because they are especially important in the development  
121 of larval activity and vision, as they accumulate in muscle, retinal rhodopsin, and brain  
122 tissue of larvae and provide them with a better orientation during feeding (Tocher 2003;  
123 Lloret et al. 2014). EPA and ARA are precursors of prostaglandins, which have a role in  
124 final oocyte maturation and ovulation (Lloret et al. 2014). Selective retention of DHA and  
125 ARA in ovaries during ovarian maturation occurs in species such as cod (Røjbek et al.  
126 2012). In the case of sardine and anchovy, there is evidence of the importance of fatty  
127 acids in their reproduction success. For example, a significant variation in the EPA and  
128 ARA concentration of Iberian sardine oocytes was found to be caused by parental effects,  
129 with the amount, and particularly the composition, of the fat reserves that sardines are  
130 able to accumulate prior to the spawning season having a marked effect on the quality of  
131 the eggs produced during the spawning season (Garrido et al. 2007). Hence, from an eco-  
132 physiological perspective, assessing PUFAs is one of the best ways to test the effects of  
133 lipid reserves on the reproductive success of small pelagic fish (Lloret et al. 2014).  
134 However, the majority of marine fishes do not possess the ability to synthesize PUFAs  
135 themselves: in pelagic ecosystems, they are mostly produced only by phytoplankton and  
136 are transferred up the food webs; hence, they are considered to be essential fatty acids  
137 (EFAs; Dalsgaard et al. 2003; Lloret et al. 2014).

138

139         Furthermore, determining fatty acid profiles can help in monitoring ecosystem  
140 dynamics in the face of global climate change, reflecting baseline food web dependencies  
141 (Auel et al. 2002; Dalsgaard et al. 2003). In a changing ocean, studies of the fatty acid  
142 profiles of forage fish, complemented with other physiological measures such as  
143 oxidative stress balance, could help reveal shifts in primary productivity and consequently  
144 lead to a system-level understanding of marine trophodynamics (Litzow et al. 2006;  
145 Pethybridge et al. 2014; Queirós et al. 2019).

146

147         Along with food availability and reproduction, parasitism has also been identified  
148 as a factor affecting the body condition of several fish species in the Mediterranean (e.g.  
149 Lloret et al. 2012; Ferrer-Maza et al. 2014, 2015; 2016; Serrat et al. 2019). However, to  
150 our knowledge, only two studies have looked into the effects of parasites on the lipid  
151 content of small pelagic fish in the Mediterranean. The first, Shchepkina (1985), analyzed  
152 the lipid concentration in the liver and the white and red muscles of anchovy in the Black  
153 Sea and found that specimens that were heavily infected by nematodes showed lower  
154 lipid concentrations (especially triglycerides) in their tissues than lightly infected  
155 specimens. The second study, by Ferrer-Maza et al. (2016), revealed that certain parasites  
156 could be having a negative effect on the energy reserves of anchovy and hypothesized  
157 that the differences observed in energy reserves in anchovy could be due to the effect of  
158 parasitism rather than reproduction. However, a study from Van Beveren et al. (2016) did  
159 not provide evidence of strong pathogenicity from parasites in sardine and anchovy in the  
160 Gulf of Lion.

161

162         In this context, this study analyses, from an ecological standpoint, the fatty acid  
163 composition of sardine and anchovy from the northern Catalan Coast (NW  
164 Mediterranean) in different reproductive and feeding stages, in order to assess the links  
165 between reproduction, feeding and lipid dynamics in both species. We also evaluate a  
166 number of fatty acid trophic markers that have been proposed as candidates for assessing  
167 changes in the condition of small pelagic fish related to changes in planktonic  
168 productivity. In addition, we compare the results provided in this paper in the northern  
169 Catalan Coast with results from other areas to shed light on the current situation in the  
170 northern Catalan Sea. Finally, the lipid dynamics are complemented with the analysis of  
171 an extensive parasitism data set in order to establish whether or not parasites are in some  
172 way responsible for the poor status of these small pelagic species in the study area.

173

## 174 **Materials and methods**

175

### 176 **Sampling of individuals**

177

178         Samples of adult sardines and anchovies caught by purse seines were taken at the ports  
179 of Blanes, Roses, Sant Feliu de Guíxols, L'Escala and Palamós in the northern Catalan  
180 Sea (Figure 1), during two different periods, corresponding to the two spawning seasons  
181 reported for each species: first, the spawning season of sardine in autumn/winter period  
182 from November 2018 to January 2019 (Palomera and Olivar 1996; Ganias et al. 2007;  
183 Hani et al. 2016); and second, the spawning season of anchovy in the spring/summer  
184 period from April 2019 to June 2019 (Palomera 1992). In order to verify reproductive  
185 status, half the specimens sampled were assessed for maturity stage via visual inspection  
186 of the gonads after dissection. Based on collected commercial data and maturity stage  
187 descriptions for anchovy and sardine (ICES 2008), we concluded that our spawning  
188 individuals were in the categories *spawning capable* or *spawning* (i.e. in the early and  
189 active reproductive periods) whereas non-spawning individuals were in the categories  
190 *post-spawning*, *resting* or *developing*. Henceforth we shall refer to these as “spawning  
191 anchovy/sardine” and “non-spawning anchovy/sardine”. Inspecting the gonads of the  
192 specimens allowed us to relate lipid dynamics to reproductive cycle more precisely,  
193 compared to inferring the reproductive stage of the individuals from the month of capture,  
194 as was the case in previous works (e.g. Pethybridge et al. 2014).

195            Sampling was performed on several days each month. Fish catches were grouped  
196 in different sample units, which were classified as follows: 10 samples of spawning  
197 sardines, 15 samples of non-spawning sardines; 9 samples of spawning anchovies and 13  
198 samples of non-spawning anchovies. Sample units consisted of between 15 and 90  
199 anchovies (similar lengths, randomly selected from the catch) and between 15 and 40  
200 sardines (similar lengths, randomly selected from the catch). Because the effect of sex  
201 and length on lipid content and fatty acid levels of sardine and anchovy was not significant  
202 (as reported in the Gulf of Lion by Pethybridge et al. 2014), we grouped the specimens  
203 together. Individuals were headed and gutted within 24 h of being caught, and the muscle  
204 samples were homogenized with a grinder and kept frozen at -80 C until analysis.

#### 205    Analysis of total lipid (fat) and fatty acids

206            The fat, or lipid content and fatty acid composition were determined for the muscle of  
207 sardine and anchovy, where both species, and indeed most pelagic fishes, store most of  
208 the energy reserves (review by Lloret et al. 2014). The total lipid content (% wet weight)  
209 was determined with an automatic Soxhlet extractor (Gerhardt SOX-416 Macro)  
210 following ISO 1443:1973 for fat extraction. Ground samples were first hydrolysed with  
211 hydrochloric acid (100 ml water+50 ml hydrochloric acid for every 10 grams of sample)  
212 and the lipid fraction was extracted by repeated extraction (percolation) with a volume of  
213 150 ml of petroleum ether per 10 grams of sample. This solvent flowed for several cycles  
214 through the sample into a glass vitrified capsule (thimble) by distillation. The lipid content  
215 in the samples was then calculated by differences in weight.

216            Fatty acid methyl esters (FAMES) were analyzed by Gas Chromatography  
217 coupled with a Flame Ionization Detector (GC-FID) following ISO 12966-4:2015. First,  
218 30 g of ground sample were extracted with 50 ml of petroleum ether. The extract was  
219 then evaporated by means of a Buchi rotary evaporator R-210. FAMES were prepared by  
220 transesterification of the lipid extract, according to ISO 12966-2. FAMES were analyzed  
221 using an Agilent 7693A gas chromatograph coupled to a FID (Agilent Technologies, US).  
222 The injection volume of samples and standards was 1 µL and the column used was a high-  
223 polarity capillary column, BPX 70 (70% cyanopropyl / polysilphenylene-siloxane  
224 column, 30 m x 0.25 mm; 0.25 µm film thickness). Initial temperature was 90°C for 1  
225 min, followed by a ramp of 4°C/minute up to 206°C and then another ramp of 20  
226 °C/minute up to 246 °C at which point the temperature was held for 5 min. Detector and  
227 injector temperatures were set at 280°C and 260°C, respectively. The whole process lasted  
228 37 minutes, with an air flow of 400 mL/minute, an H<sub>2</sub> flow of 30 mL/minute and a Helium  
229 flow of 25 mL/minute. Chromatographic peaks were integrated and identified using  
230 standard samples (Supelco 37 Component FAME Mix, from Sigma Aldrich). The content  
231 of each fatty acid in lipids was expressed as a percentage of the total content of all fatty  
232 acids. A total of 24 fatty acids were identified in the total lipid fraction from both species.  
233 However, some were detected at such low levels that a cut off point for quantification  
234 was set at 0.1% for both fish species. This resulted in the quantification of 16 fatty acids.

#### 235    Indices of trophic relationships

236            In order to assess trophic relationships, we computed the following ratios (Auel et al.  
237 2002; Dalsgaard et al. 2003): palmitoleic acid/palmitic acid (16:1 n-7/16:0; or PO/P) and  
238 eicosapentaenoic acid/docosahexaenoic acid (20:5 n-3/22:6 n-3; or EPA/DHA). High  
239 values of these ratios indicate a diatom-based diet, whereas low values indicate a

240 dinoflagellate-based diet. This is because among the specific lipid components suggested  
241 as suitable for use as trophic biomarkers in the pelagic marine environment (Dalsgaard et  
242 al. 2003), diatoms contain high levels of PO, 16:1 n-7 and EPA, 20:5 n-3, whereas  
243 dinoflagellates usually contain elevated concentrations of stearidonic acid (18:4 n-3 or  
244 SDA) and DHA. Moreover, high EPA/DHA ratios indicate a diet that is predominantly  
245 carnivorous (zooplanktivorous), whereas low EPA/DHA ratios indicate a more  
246 herbivorous (phytoplanktivorous) diet (Dalsgaard et al. 2003). High EPA/DHA ratios  
247 may also be indicative of an important influence of the primary production of cold-  
248 diatoms, since cold-water diatoms accumulate especially high amounts of EPA (Falk-  
249 Petersen et al. 1998; Scott et al.1999).

250

251

252 Evaluation of parasitism

253

254 To evaluate parasitism, we used the data provided by the Catalan Health Agency gathered  
255 from a 6-year program (2002-2007) that monitored parasites in exploited fish species  
256 landed in Catalan ports (Servei de Veterinària de Salut Pública, 2007). Samples were  
257 collected randomly on a monthly basis by the Agency's veterinary inspectors at seven of  
258 the main fishing ports on the northern Catalan coast. The specimens were caught in the  
259 same areas (although in different years) where the specimens used to evaluate fatty acids  
260 were caught. In total, 1,269 sardines (measuring between 11 and 31 cm) and 773  
261 anchovies (measuring between 7 and 23 cm) were analyzed for the presence of  
262 macroparasites. Immediately after landing, the inspectors recorded the total body length  
263 of each specimen and examined them for macroparasites in the gills, skin, fins and  
264 intestines using a binocular microscope in facilities at each port. When found, parasites  
265 were preserved in a lactophenol solution composed of 1:2:1 lactic acid, glycerol and  
266 water. The preserved parasites were then sent to the laboratories of the Catalan Centre of  
267 Microbiology where they were identified to the lowest possible taxa possible. 23% of  
268 sardine parasites and 16% of the anchovy parasites could be not identified. The  
269 prevalence of parasites was calculated as the proportion of fish infected with parasites,  
270 whereas the mean intensity of parasitism was calculated as the average number of  
271 parasites found in the infected hosts.

272

273

274 Statistical tests

275

276 For each fish species, a one-way ANOVA, considering the spawning and non-spawning  
277 period as a factor, was used to examine the existence of significant differences in fatty  
278 acid composition and fat content. A post-hoc Tukey HSD was used to identify statistical  
279 differences between means. In addition, a Principal Component Analysis (PCA) was  
280 carried out to examine the relationships between fatty acid profiles, fatty acid ratios (PO/P  
281 and EPA/DHA) and fat content. Furthermore, for each species, the difference in the  
282 prevalence of parasites between spawning and non-spawning individuals was tested using  
283 a Chi-square 2x2 contingency table. In all cases, the statistical significance was  
284 predetermined at  $P < 0.05$ . All analyses were performed using JMP13 software (SAS  
285 Institute, Cary, North Carolina, USA).

286

287

288 **Results**

289

290 Total lipid content (fat) and fatty acid profiles

291

292 The values for total lipid content (% wet weight) in the muscle tissue of sardine  
293 and anchovy are shown in Table 1. Lipid content was significantly lower in muscle  
294 from spawning sardine (mean value, 1.78%) compared to non-spawning sardine  
295 (mean, 5.86%). In contrast, lipid content was significantly higher in muscle from  
296 spawning anchovy (mean, 2.46%) compared to non-spawning anchovy (mean,  
297 0.89%).

298

299 The fatty acid compositions of the total lipid fraction (from the muscle in all cases)  
300 of both sardines and anchovies are presented in Table 1.

301 Saturated fatty acids (SFAs): between 37.49% and 46.33% of the total fatty acids in  
302 sardine and between 33.52% and 43.50% in anchovy were SFAs. The most abundant SFA  
303 in sardine and anchovy (spawning and non-spawning) was C16:0. Significant differences  
304 in the proportion of certain fatty acids between spawning and non-spawning fish were  
305 observed. The proportion of C16:0, C17:0, C18:0 – as well as total SFAs – was  
306 significantly higher in spawning sardine than in non-spawning sardine, while the reverse  
307 was true for C24:0, which was significantly higher in non-spawning sardine. In the case  
308 of anchovy, the proportion of C16:0, C17:0, C18:0 – as well as total SFAs – was  
309 significantly lower in spawning anchovy than in non-spawning anchovy, while the  
310 reverse was true for, in this case, C20:0, which was significantly higher in non-spawning  
311 anchovy (Table 1).

312

313 Monounsaturated fatty acids (MUFAs): between 20.33% and 23.61% of total fatty  
314 acids in sardine muscle and between 15.59% and 17.15% of total fatty acids in anchovy  
315 muscle were MUFAs. The most abundant MUFA in sardine and anchovy (spawning and  
316 non-spawning) was C18:1n-9. The proportion of C18:1n-9 and total MUFA was  
317 significantly lower in spawning sardines than in non-spawning sardines. In the case of  
318 anchovy, the proportion of C18:1n-9 was also significantly lower in spawning anchovy  
319 than in non-spawning anchovy, but the reverse was true for the proportion of C22:1n-9,  
320 which was significantly higher in non-spawning anchovy (Table 1).

321

322 Polyunsaturated fatty acids (PUFAs): between 33.32% and 38.88% of the total fatty  
323 acids in sardine muscle and between 39.34% and 50.90% in anchovy muscle were  
324 PUFAs, most of which were n-3 PUFAs (which comprised between 30.13% and 35.75%  
325 of total fatty acids in sardine, and between 35.31% and 47.53% in anchovy). The main  
326 differences between the proportion of PUFAs in spawning and non-spawning individuals  
327 of both species involve n-3 PUFAs. Among the PUFAs, C22:6 n-3 (DHA) was present in  
328 the highest proportion in both species and in both spawning and non-spawning  
329 individuals. Significantly lower proportions of total PUFA, C20:5 n-3 (EPA), C18:3 n-3,  
330 C18:2 n-6 and n-3 PUFA were found in spawning sardines compared to non-spawning  
331 sardines; whereas, significantly higher proportions of C18:2 n-6, EPA, DHA and n-3  
332 PUFA were found in spawning anchovy than in non-spawning anchovy. Only the  
333 proportion of C20:4 n-6 was found to be significantly lower in spawning anchovy than in  
334 non-spawning anchovy (Table 1).

335

336

337 Principal component analysis (PCA)

338

339 A PCA was performed to examine the variation in fatty acid composition between the  
340 two fish species and period of spawning, and to identify the fatty acids most responsible  
341 for this variation. The first two components of the PCA explained 62.8% of the variance.  
342 As shown in Figure 2, Component 1 influences the majority of SFAs and n-3 PUFAs.  
343 Component 1 positively influences C16:0, C17:0, C18:0 and total SFA, and the ratios  
344 between C16:1/C16:0 (PO/P) and EPA/DHA, which are localized together and in  
345 opposite coordinates to C24:0, C20:5 n3, C18:2 n-6 and C22:1 n-9. In addition, C22:6 n-  
346 3, total n-3 PUFAs and C20:0 are grouped together and negatively influenced by  
347 Component 1. Meanwhile, Component 2 positively influences fat content and most of the  
348 MUFAs. Linolenic acid (C18:3 n-3) and C22:0 are also positively influenced by  
349 Component 2. Conversely, n-6 PUFA and C20:4 n-6 are negatively influenced by  
350 Component 2.

351

352 In general, the two PCA components allow the variability of fish species to be explained  
353 by the period of spawning. Component 1 is associated with the PO/P and EPA/DHA ratios  
354 and mainly explains the variability in the fatty acid profile of anchovy due to the spawning  
355 period. Accordingly, it seems possible to separate spawning anchovies from non-  
356 spawning anchovies by the increase in EPA and DHA (as well as total n-3 PUFAs) and  
357 C20:0 and the decrease in the proportion of SFAs with a chain length of up to 18 carbons.  
358 Non-spawning sardines are also separated from non-spawning anchovies mainly due to  
359 the n-6 and n-9 fatty acid series (Component 2). Similarly, SFAs and n-3 PUFAs help to  
360 differentiate between spawning sardines and spawning anchovies (Component 1).

361

362

363 Parasitism

364

365 All the parasites identified in sardines and anchovies were nematode larvae. The results  
366 of the Chi-square tests for each fish species showed that the differences in the prevalence  
367 of parasites between spawning and non-spawning sardines and anchovies were  
368 insignificant. Therefore, the prevalence by species is presented for all individuals  
369 (spawning and non-spawning) taken together. Of all the dissected sardine specimens,  
370 7.88% were infected with at least one nematode, with an intensity that ranged between  
371 one and three parasites (mean intensity=1.15). *Hysterothylacium* sp was the most frequent  
372 parasite, comprising 75.00% of the total nematodes identified, followed by *Anisakis* sp  
373 (22.92% of the total). Of all the dissected anchovy specimens, 12.16% were infected with  
374 at least one nematode, with an intensity that ranged between one and four parasites (mean  
375 intensity=1.10). Again, *Hysterothylacium* sp was the most frequent parasite, comprising  
376 70.40% of the total nematodes identified, followed by *Anisakis* sp (28.61% of the total).

377

378

379

380 **Discussion**

381

382 Our results provide new insights into lipid changes in sardine and anchovy that will  
383 contribute to our understanding of the physiology and ecology of these small pelagic  
384 species in the Mediterranean Sea in the face of changing environmental conditions.

385

386

387 Seasonal variation in total lipid content and fatty acid profile in relation to reproduction  
388 and feeding cycles



389

390 First, this study demonstrates seasonal variations in total lipid content between spawning  
391 and non-spawning sardine and anchovy in the northern Catalan Sea, and these variations  
392 are linked to the different reproduction and feeding strategies of the two species. For  
393 sardine, our study found the lowest total lipid content values during the spawning season,  
394 i.e., in the autumn-winter period of low food (plankton) availability; for anchovy, the  
395 highest values were found during the spawning season, i.e., in the spring-summer period  
396 of high food (plankton) availability. Similar patterns of seasonal variability in total lipid  
397 content have already been reported in other studies (Ganias et al. 2007; Sánchez et al.  
398 2013; Pethybridge et al. 2014; Ferrer-Maza et al. 2016; Albo Puigserver, 2019) and are  
399 in consonance with the breeding strategy of each species: sardine has been described  
400 mainly as a capital breeder, relying on energy stores accumulated prior to reproduction,  
401 whereas anchovy has been described mainly as an income breeder, relying on an abundant  
402 food source during their spawning phase (García and Palomera 1996, Somarakis et al.  
403 2004; McBride et al. 2015; Brosset et al. 2016b).

404

405 Second, our study has been able to link the fatty acid composition of sardine and  
406 anchovy in the northern Catalan Sea with the reproductive and feeding cycle of these  
407 species. In the case of sardine, and in line with the total lipid content data, levels of total  
408 MUFAs and total PUFAs were highest during the non-spawning season during which  
409 feeding intensity is high, in consonance with capital breeding strategy. In the case of  
410 anchovy, and also in line with the total lipid content data, the total PUFAs were  
411 significantly higher during the spawning season, during which the phytoplankton are in  
412 maximum supply, in consonance with its income breeding strategy. However, while the  
413 differences in MUFAs between spawning and non-spawning anchovies were not  
414 significant, the total SFA values in both species displayed the opposite pattern to that of  
415 total lipid with significantly higher values in spawning sardine and in non-spawning  
416 anchovy.

417

418 The reproductive and feeding cycles of these two fish species explain the  
419 variability in the fatty acid composition that can be differentiated by means of a PCA.  
420 Similar findings have been reported for the fatty acid composition of sprat, sardine and  
421 anchovy collected in Gulf of Lion (Pethybridge et al. 2014). These authors reported that  
422 C14:0, C16:0, C16:1 n-7, C18:1 n-9, EPA and DHA are crucial for explaining the  
423 variability in the fatty acid composition of these fish species which is very consistent with  
424 our findings (Figure 2). It is also worth noting that the PO/P and EPA/DHA ratios  
425 together with the proportions of C18:1 n-9, and, to a lesser extent, EPA and C14:0, can  
426 help to explain feeding habits. It appears, therefore, that the sardine's diet during  
427 spawning is more carnivorous (zooplanktivorous) and less herbivorous  
428 (phytoplanktivorous) than it is during non-spawning. However, these indices lack  
429 significance in the case of anchovy which suggests that it has different feeding habits  
430 compared to sardine, supporting the hypothesis that sardine and anchovy probably do not  
431 compete strongly for food resources (Chouvelon et al. 2015). As shown in the PCA,  
432 higher percentages in DHA seem to discriminate anchovies during spawning when their  
433 diet may be richer in dinoflagellates and, in general, phytoplankton.

434

435 Our findings also suggest that, in general, a higher proportion of MUFAs is associated  
436 with fatter fish, which may explain the relatively lower proportion of very long chain n-  
437 6 PUFAs, with the exception of the precursor of n-6 fatty acid series, linoleic acid (18:2  
438 n-6). On the other hand, the increase in very long-chain n-3 PUFAs seems to be at the

439 expense of SFAs containing up to 18 carbon atoms. SFAs and MUFAs are major sources  
440 of metabolic energy in fish (particularly, C16:0, which is a predominant source of  
441 potential metabolic energy during growth and ovary development; Henderson et al.  
442 1984), and can be synthesized by the fish themselves. There are, therefore, complex trade-  
443 offs between reproduction, growth and basal energy that cannot be fully explained in our  
444 study.

445

446 The relevance of PUFAs

447 We shall now turn our attention to the PUFA levels, bearing in mind that they may provide  
448 the only outputs that can be easily interpreted from a physiological point of view. In  
449 particular, n-3 PUFAs have been identified as a major dietary factor determining  
450 successful reproduction in fish, as they are crucial for the future requirements of the  
451 progeny (Tocher 2003, Lloret et al. 2014). There is a high requirement for n-3 PUFAs in  
452 the developing eggs and larvae of fish because of their preponderance in neural and visual  
453 tissues, which predominate in the early stages of development (Bruce et al. 1999). Hence,  
454 any deficiency in these particular fatty acids can cause abnormalities in the neural system  
455 and may affect the success of larvae as visual predators at the onset of first feeding (Bell  
456 and Sargent 1996). In fact, anchovy larvae in the NW Mediterranean contain a high  
457 proportion of PUFAs (Rossi et al. 2006).

458 The variation in total PUFA levels found in sardine and anchovy in the northern  
459 Catalan Sea was mostly due to variations in the levels of highly unsaturated fatty acids,  
460 namely the n-3 fatty acids, EPA and DHA. Although the relative proportion of n-3 PUFAs  
461 in the fatty acids of non-spawning sardine and non-spawning anchovy was quite similar  
462 (about 35%), the relative proportion in spawning sardine was much lower (about 30%)  
463 than in spawning anchovy (47%). If we consider the significant relationships found  
464 between n-3 PUFAs in female muscle and oocytes of sardine in the North Atlantic, and  
465 the relationship between female diet – in particular, plankton availability immediately  
466 before and during the spawning season – and the quality of offspring produced by sardine  
467 (Garrido et al. 2007), then we can surmise that the relatively low proportion of n-3 PUFAs  
468 in spawning sardines in the northern Catalan Sea indicates a poorer reproductive status of  
469 this species than that of anchovy. It must be also taken into account that sardines have a  
470 lower degree of trophic plasticity than anchovies, both in terms of feeding areas and in  
471 the size of the zooplanktonic prey consumed (Chouvelon et al. 2015) and that Van  
472 Beveren et al. (2016) revealed elevated quantities of macrophage aggregates in sardines  
473 in the Gulf of Lion indicating stress on the fish that might potentially be related to  
474 starvation. In the following section we address the issue of the challenging food supply  
475 over time in more detail

476

477 What do fatty acids tell us regarding the current status of sardine and anchovy stocks  
478 under challenging environmental conditions?

479

480 In order to understand the challenges facing small pelagic fish in the  
481 Mediterranean, and particularly that of sardine, we shall now discuss how the fatty acid  
482 profiles, and the ratios computed, help to explain the potential causes behind the current  
483 status of the stocks. In our study, low diatom markers were present throughout the  
484 spawning and non-spawning seasons of sardine and anchovy. The low (< 0.50) ratios of  
485 PO/P, and EPA/DHA for both sardine and anchovy during the non-spawning periods

486 support the hypothesis of a diet for both species that is not predominantly based on  
487 diatoms. This is in contrast to the situation ten years ago (2010 and 2011) in the adjacent  
488 waters of the Gulf of Lion, where for all seasons, these ratios indicated a predominantly  
489 diatom-based diet for both species (Pethybridge et al. 2014). In fact, studies on stomach  
490 analyses of sardine in the Gulf of Lion at that time (2011-2012) showed a higher  
491 proportion of diatoms in the diet compared to dinoflagellates, a situation that was more  
492 accentuated during summer when diatom abundance was usually high after the spring  
493 bloom (Le Bourg et al. 2015; Leblanc et al. 2003).

494

495 Furthermore, the relatively low PO/P and EPA/DHA ratios of non-spawning  
496 sardine in the northern Catalan Sea compared to the ratios observed in other  
497 Mediterranean and North Atlantic areas indicate that, in the Catalan Sea, the proportion  
498 of diatoms in the diet of sardine is lower than in other areas (Table 2). Furthermore, the  
499 comparatively lower EPA/DHA values and high C16:0 values of non-spawning sardines  
500 in the northern Catalan Sea suggest that low-energy phytoplankton is proportionally more  
501 important than high-energy zooplankton in the sardine's diet in the study area compared  
502 to other areas. This pattern does not occur in anchovy (Table 3), for which the ratios of  
503 PO/P, EPA/DHA and the levels C16:0 in non-spawning individuals from the Catalan Sea  
504 are similar to other Mediterranean areas, except in the Black Sea, where higher PO/P,  
505 EPA/DHA values and lower C16:0 values are found (Table 3). Notwithstanding these  
506 results, the comparison of fatty acid profiles between areas must be taken with caution,  
507 because values compared are expressed in % of total fatty acid mass, and it would be  
508 much better to compare data on absolute fatty acid content (% body mass) (Litzow et al.  
509 2006).

510

511 Although our results show relatively similar or higher values of essential fatty  
512 acids in non-spawning sardine and anchovy compared to other Mediterranean and  
513 Atlantic areas (Tables 2 and 3), when we compare the level of total fat content of non-  
514 spawning sardine and anchovy in our study area with that of the Gulf of Lion ten years  
515 ago (Pethybridge et al. 2014), we can conclude that the total fat content in the muscle of  
516 both species has declined (Tables 2 and 3). This may be related to a decrease in primary  
517 production, since a recent study in a coastal area of the northern Catalan Sea showed that  
518 most of the phytoplankton groups there presented a decreasing linear interannual trend in  
519 abundance, which could be associated with a reduction in nutrient availability (Nunes et  
520 al. 2018). Furthermore, the total lipid content of non-spawning sardines and anchovies in  
521 the northern Catalan Sea is also much lower than in the other areas (Tables 2 and 3)  
522 suggesting that sardine may even be forced to rely on direct food intake to acquire enough  
523 energy during the spawning period.

524

525 Taking all these results together, it appears that a decrease in plankton  
526 productivity and/or a shift in the taxonomic composition of phytoplankton communities  
527 may have occurred in the northern Catalan Coast in the last decade, although further  
528 investigations are needed to confirm this statement as the studies carried out so far remain  
529 scarce (Thiébaud et al. 2016). The results from our study support the hypothesis proposed  
530 by Saraux et al. (2019) that changes in plankton availability/diversity may be a factor in  
531 the poor condition observed in small pelagic fish in the NW Mediterranean. By altering  
532 the pelagic environment, climate change may be altering the composition and distribution  
533 of plankton species, as well as their importance in the food web, with higher temperatures  
534 favouring the smallest components of the plankton, thus strengthening microbial loop  
535 activity (Thiébaud et al. 2016). As increasing temperature favours planktonic organisms

536 of smaller size, climate change may particularly affect the condition of sardine, as recent  
537 results revealed that food size (without any modification of its energy content) is as  
538 important as food quantity for the body condition, growth and reserve lipids of sardine  
539 (Queirós et al. 2019). Furthermore, fluctuations in the diatom/dinoflagellate ratio may  
540 have ecosystem-wide consequences for the transfer of energy and matter to higher trophic  
541 levels considering the importance of both groups in the trophic chain of many seas  
542 (Wasmund et al. 2017). Although EFA availability is generally high in marine  
543 ecosystems, it is also highly variable, implying that, occasionally, EFA availability is  
544 limited (Litzow et al. 2006). In the Pacific Ocean, for example, it seems that climate-  
545 mediated changes in the availability of EFA were behind the changes in lipid content of  
546 different fish communities, supporting a growing consensus that EFA availability may  
547 influence trophic structure in aquatic ecosystems (Litzow et al. 2006).

548

549

550 Parasitism

551

552 Our results on parasitism showed that the metazoan parasite fauna of sardine and anchovy  
553 in the northern Catalan Sea is dominated by nematode larvae. However, considering the  
554 low prevalence and low intensity of parasites in sardine and anchovy in the study area,  
555 our results are in line with Van Beveren et al. (2016) and Saraux et al. (2019) both of  
556 which concluded that it is very unlikely that parasites, or any other pathogenic agent, are  
557 root causes of the drastic population modifications observed in sardine and anchovy in  
558 the NW Mediterranean. For sardine, the study by Van Beveren et al. (2016) found no link  
559 between sardine condition and a wide range of potential pathogens, including parasites  
560 (although only microparasites were found), viruses and bacteria; in other words, no strong  
561 indications of pathogenicity were found. In contrast, for anchovy, a study by Ferrer-Maza  
562 et al. (2016) showed that certain species of parasites had a negative effect on female egg  
563 production and lipid content in smaller individuals. However, there is a wide range of  
564 research available concerning the nematodes that infect anchovy and sardine in the  
565 Mediterranean (e.g. Rello et al. 2009; Gutiérrez-Galindo et al. 2010; Cavallero et al. 2015;  
566 Zorica et al. 2016) and, in general, such studies have reported a relatively low prevalence  
567 of nematodes in these two species, ranging from 0 to 25%, with low values for overall  
568 prevalence when data from different studies were pooled (<3% in the case of Anisakids  
569 in the meta analysis conducted by Colombo et al. 2016). In a study by Rello et al. (2008),  
570 *H. aduncum* was the only Anisakid parasite found in sardines from the southern and  
571 eastern coasts of Spain, with a total prevalence of 11.85%. Although it is true that  
572 prevalence may change depending on season, parasite species and area (Mladineo et al.  
573 2012; Zorica et al. 2016), such low values support the idea that parasites are probably not  
574 responsible for the poor status of sardine and anchovy stocks in the Mediterranean.

575

576 Our results contribute to the literature on parasitic infestation of sardine and  
577 anchovy in the northern Catalan Sea because, for the first time, we used extensive data  
578 from a monitoring programme covering many ports and years and seasons. However, it  
579 must be noted that other metazoan parasites (such as Digenea and Cestoda) are found in  
580 particular organs, such as pyloric caeca and the stomach, which are difficult to evaluate  
581 in the port and may have gone undetected by the veterinarian inspectors involved in the  
582 programme. It must also be noted, however, that inside the musculature of anchovy, the  
583 number of parasites is negligible (Ferrer-Maza et al. 2016). Overall, the evaluation carried  
584 out by the inspectors in the frame of the monitoring programme in the northern Catalan  
585 Sea ports provide good estimates of parasitism in this region, despite the fact that

586 monitoring parasite infestations in fish is particularly challenging due to the complex  
587 interactions among hosts, parasites and the environment, and the existence of many zero-  
588 values (Helland et al. 2015).

589

590

## 591 **Conclusion**

592

593 The results from this study provide evidence that fatty acid levels are good indicators not  
594 only of the body condition at different reproductive and feeding stages of small pelagic  
595 fish, but also of pelagic environmental conditions in the context of global change. The  
596 study contributes to our understanding of the trade-off between condition, reproduction  
597 and feeding in sardines and anchovies through the analysis of variations in the profiles of  
598 fatty acids that are crucial in key life history traits of these forage species, particularly  
599 reproductive success. In our study, low diatom markers were observed throughout the  
600 spawning and non-spawning seasons of sardine and anchovy, indicating a potential shift  
601 in the diets of sardine and anchovy in the area from diatoms to dinoflagellates. Overall,  
602 these results indicate that a decrease in plankton productivity and/or a shift in the  
603 taxonomic composition of phytoplankton communities may have occurred in the northern  
604 Catalan Sea in the last decade. Feeding conditions in spring and summer appear to be a  
605 key factor in determining not only total lipid content but also the levels of specific fatty  
606 acids of sardine and anchovy in the NW Mediterranean. According to our results, it would  
607 appear that, based on total lipid content and fatty acid distribution, sardine and, to a lesser  
608 extent, anchovy, in the northern Catalan Sea are currently in poor condition and  
609 malnourished. In order to confirm this trend and to confirm any potential limitations in  
610 PUFA/EFA availability, further studies on the fatty acids of small pelagic fish in the area  
611 will be needed. Because lipid biochemistry is complex, more research into the nature of  
612 the PUFA/EFA requirements is needed before the ecological implications can be  
613 elucidated.

614 Our results also support the idea that it is very unlikely that parasites are a root  
615 cause of the decline in the condition of sardine and anchovy in the NW Mediterranean,  
616 but any increase in parasitism could instead be the result of qualitative and/or quantitative  
617 modifications in planktonic production leading to fish in poorer condition, particularly  
618 sardines. Further studies on the planktonic composition and its evolution in the  
619 Mediterranean Sea are needed to improve our understanding of the impacts of changing  
620 food quantity and quality on the condition of these small pelagic fish, which may have  
621 consequences not only for fisheries but also for the whole trophic chain – considering  
622 their importance as forage species. Furthermore, bearing in mind that, in the Catalan Sea,  
623 which is part of GSA6, the sardine and anchovy stocks are considered to be overexploited  
624 according to STECF assessments (STECF 2016), the poor condition status of these  
625 species adds to the worries posed by the impact of fishing activity. This is more evident  
626 for sardine, which according to assessments made by GFCM (2017) has seen a negative  
627 trend in landings and acoustic biomass estimates since 1994 in GSA 6.

628

629

## 630 **Acknowledgements**

631

632 This study was supported by FLAG / GALP-Costa Brava projects Ref. ARP014/17/00007  
633 and Ref. ARP014/17/00054 (financed by the European Maritime and Fisheries Fund –  
634 EMFF and the DG Fisheries of the Catalan Govt.). The authors thank A. Rossell, C.  
635 Canals and two undergraduate students of the University of Girona (Elena and Cristina)

636 for their help processing samples, as well as to all the fishermen and fishmongers who  
637 collaborated in the study. We also thank Dr. Marta Estrada for her valuable comments.

638

639

#### 640 **Conflict of Interest**

641

642 The authors declare that they have no conflict of interest.

643

644

#### 645 **References**

646

647 Albo-Puigserver M, Muñoz A, Navarro J, Coll M, Pethybridge H, Sánchez S, Palomera  
648 I (2017) Ecological energetics of forage fish from the Mediterranean Sea:  
649 seasonal dynamics and interspecific differences. *Deep-Sea Res II* 140, 74–82.  
650 <http://dx.doi.org/10.1016/J.DSR2.2017.03.00>

651

652 Albo-Puigserver M, Borme D, Coll M, Tirelli V, Palomera I, Navarro J (2019) Trophic  
653 ecology of range-expanding round sardinella and resident sympatric species in  
654 the NW Mediterranean. *Mar Ecol Prog Ser* 620:139-  
655 154. <https://doi.org/10.3354/meps12962>

656

657 Auel H, Harjes M, da Rocha R, Stubing D & Hagen W (2002) Lipid biomarkers indicate  
658 different ecological niches and trophic relationships of the Arctic hyperiid  
659 amphipods, *Themisto abyssorum* and *T. libellula*. *Polar Biol* 25:374383

660

661 Bandarra MA, Marçalo A, Cordeiro AR, Pousão-Ferreira P (2018) Sardine (*Sardina*  
662 *pilchardus*) lipid composition: Does it change after one year in captivity? *Food*  
663 *Chemistry* 244:408–413

664

665 Basilone G, Guisande C, Patti B et al (2004) Linking habitat conditions and growth in  
666 the European anchovy (*Engraulis encrasicolus*). *Fish Res* 68:9–19.  
667 <https://doi:10.1016/j.fishres.2004.02.012>

668

669 Basilone G, Guisande C, Patti B, Mazzola S, Cuttitta A, Bonanno A, Vergara AR,  
670 Maneiro I (2006) Effect of habitat conditions on reproduction of the European  
671 anchovy (*Engraulis encrasicolus*) in the Strait of Sicily. *Fish Oceanogr* 15:271–  
672 280. <https://doi.org/10.1111/j.1365-2419.2005.00391.x>

673

674 Brosset P, Ménard F, Fromentin JM, Bonhommeau S, Ulses C, Bourdeix JH, Bigot JL,  
675 Van Beveren, E, Roos D, Saraux C (2015) Influence of environmental variability  
676 and age on small pelagic fish body condition in the Gulf of Lions. *Mar Ecol Prog*  
677 *Ser* 529:219–231

678

679 Brosset P, Le Bourg B, Costalago D, Banaru D, Bourdeix JH, Van Beveren E, Fromentin  
680 JM, Ménard F, Saraux C (2016a) Linking small pelagic dietary shifts and  
681 ecosystem changes in the Gulf of Lions. *Mar Ecol Prog Ser* 554, 157–171.  
682 <https://doi: 10.3354/meps11796>

683

- 684 Brosset P, Lloret J, Muñoz M, Fauvel C, Van Beveren E, Marques V, Fromentin JM,  
685 Ménard F, Saraux C (2016b) Biased allocation towards reproduction in small  
686 pelagic stocks under poor condition. *R Soc Open Sci* 3:160202  
687
- 688 Brosset P, Fromentin JM, Van Beveren E, Lloret J, Marques V, Basilone G, Bonanno A,  
689 Carpi P, De Felice A, Donato F, Ferreri R, Giráldez A, Gücü A, Iglesias M, Keč  
690 V, Leonori I, Palomera I, Somarakis S, Ticina V, Torres P, Ventero A, Zorica B,  
691 Menard F, Saraux C (2017) Spatio-temporal patterns and Environmental controls  
692 of small pelagic fish body condition from contrasted Mediterranean areas. *Prog*  
693 *Oceanogr* 151:149–162  
694
- 695 Bruce M, Oyen F, Bell G, Asturiano JF, Farndale B, Ramos J, Bromage N, Carrillo M,  
696 Zanuy S (1999) Development of broodstock diets for the European sea bass  
697 (*Dicentrarchus labrax*) with special emphasis on the importance of n–3 and n–6  
698 HUFA to reproductive performance. *Aquaculture* 177:85–97.  
699 [https://doi.org/10.1016/S0044-8486\(99\)00071-X](https://doi.org/10.1016/S0044-8486(99)00071-X)  
700
- 701 Cavallero S, Magnabosco C, Civettini M, Boffo L, Mingarelli G, Buratti P, Giovanardi  
702 O, Fortuna CM, Arcangeli G (2015) Survey of *Anisakis* sp. and *Hysterothylacium*  
703 sp. in sardines and anchovies from the North Adriatic Sea. *Int J Food Microbiol*  
704 200:18–21  
705
- 706 Chouvelon T, Violamer L, Dessier A, Bustamente P, Mornet F, Pignon-Mussaud C,  
707 Dupuy C (2015) Small pelagic fish feeding patterns in relation to food resource  
708 variability: an isotopic investigation for *Sardina pilchardus* and *Engraulis*  
709 *encrasicolus* from the Bay of Biscay (north-east Atlantic). *Mar Biol* 162:15–37.  
710 <https://doi.org/10.1007/s00227-014-2577-5>  
711
- 712 Coll M, Bellido JM (2019) Evaluation of the population status and specific management  
713 alternatives for the small pelagic fish stocks in the Northwestern Mediterranean  
714 Sea (SPELMED) Final Report SC NR 02  
715
- 716 Colombo F, Cattaneo P, Castelletti M, Bernardi C (2016) Prevalence and mean intensity  
717 of Anisakidae parasite in seafood caught in Mediterranean Sea focusing on fish  
718 species at risk of being raw-consumed. A meta-analysis and systematic review.  
719 *Crit Rev Food Sci Nutr* 56:1405–1416.  
720
- 721 Costalago D, Palomera I (2014) Feeding of European pilchard (*Sardina pilchardus*) in  
722 the northwestern Mediterranean: from late larvae to adults. *Sci Mar* 78:41–54  
723
- 724 Cury P, Bakun A, Crawford RJM, Jarre A, Quiñones RA, Shannon LJ, Verheye HM  
725 (2000) Small pelagics in upwelling systems: patterns of interaction and structural  
726 changes in “wasp-waist” ecosystems. *ICES J Mar Sci* 57:603–618  
727
- 728 Dalsgaard J, John MS, Kattner G, Muller-Navarra D, Hagen W (2003) Fatty acid trophic  
729 markers in the pelagic marine environment. *Adv Mar Biol* 46:225–340  
730
- 731 De Leonardis A and Maccila V (2004) A study on the lipid fraction of Adriatic sardine  
732 filets (*Sardina pilchardus*) *Nahrung/Food* 48 (3):209 – 212  
733

- 734 Falk-Petersen S, Sargent J, Henderson J, Hegseth EN, Hop H, Okolodkov YB (1998)  
735 Lipids and fatty acids in ice algae and phytoplankton from the marginal Ice Zone  
736 in the Barents Sea. *Polar Biol* 20:41-47.  
737
- 738 Ferrer-Maza D, Lloret J, Muñoz M, Faliex E, Vila S, Sasal P (2014) Parasitism, condition  
739 and reproduction of the European hake (*Merluccius merluccius*) in the  
740 northwestern Mediterranean Sea. *ICES J Mar Sci* 71:1088–1099  
741
- 742 Ferrer-Maza D, Muñoz M, Lloret J, Faliex E, Vila S, Sasal P (2015) Health and  
743 reproduction of red mullet, *Mullus barbatus*, in the western Mediterranean Sea.  
744 *Hydrobiologia* 753:189–204.  
745
- 746 Ferrer-Maza D, Lloret J, Muñoz M, Faliex E, Vila S, Sasal P (2016) Links between  
747 parasitism, energy reserves and fecundity of European anchovy, *Engraulis*  
748 *encrasicolus*, in the northwestern Mediterranean Sea. *Conserv Physiol* 4:  
749 [https://doi:10.1093/conphys/cov069](https://doi.org/10.1093/conphys/cov069).  
750
- 751 Ganias K, Somarakis S, Koutsikopoulos C, Machias A (2007) Factors affecting the  
752 spawning period of sardine in two highly oligotrophic Seas. *Mar Biol* 151:1559–  
753 1569. <http://dx.doi.org/10.1007/s00227-006-0601-0>  
754
- 755 García A and Palomera I (1996) Anchovy early life history and its relation to  
756 surrounding environment in the western Mediterranean Basin. In: I. Palomera  
757 and P. Rubiés (eds.) *The European anchovy and its environment*. *Sci Mar* 60  
758 (Suppl.2):155-156  
759
- 760 Garrido S, Rosa R, Ben-Hamadou R, Cunha ME, Chícharo MA, Lingen CD (2007)  
761 Effect of maternal fat reserves on the fatty acid composition of sardine (*Sardina*  
762 *pilchardus*) oocytes. *Comp Biochem Physiol B Biochem Mol Biol* 148(4):398-  
763 409  
764
- 765 General Fisheries Commission for the Mediterranean (2017) Scientific Advisory  
766 Committee on Fisheries. Working Group on Stock Assessment on Small Pelagic  
767 Species (WGSASP). FAO HQ, Rome Italy, November 2017. Report. 66p  
768
- 769 Goetz SJ, Prince SD, Goward SN, Thawley MM, Small J and Johnston A (1999)  
770 Mapping net primary production and related biophysical variables with remote  
771 sensing: application to the BOREAS region, *J. Geophys. Res* 104 D22:27,719-  
772 27,734, N  
773
- 774 Gutiérrez-Galindo JF, Osanz-Mur AC, Mora-Ventura MT (2010). Occurrence and  
775 infection dynamics of anisakid larvae in *Scomber scombrus*, *Trachurus*  
776 *trachurus*, *Sardina pilchardus*, and *Engraulis encrasicolus* from Tarragona (NE  
777 Spain). *Food Control* 21:1550-1555. [https://doi:](https://doi.org/10.1016/j.foodcont.2010.03.019)  
778 [10.1016/j.foodcont.2010.03.019](https://doi.org/10.1016/j.foodcont.2010.03.019).  
779
- 780 Hani S, Amel S, Khadidja B, Leila A (2016) Histological Followed the Sexual Cycle of  
781 the Mediterranean Sardine *Sardina Pilchardus* (Walbaum 1792) fished in Gulf  
782 Annaba Northeast of Algeria. *j agric vet sci* 9(6):23-33  
783



- 784 Helland IP, Uglem I, Jansen PA, Diserud OH, Bjørn PA, Finstad B (2015) Statistical and  
785 ecological challenges of monitoring parasitic salmon lice infestations in wild  
786 salmonid fish stocks. *Aquacult Environ Interact* 7: 267–280  
787
- 788 ICES (2008) Report of the Workshop on Small Pelagics (*Sardina Pilchardus*, *Engraulis*  
789 *Encrasicolus*) Maturity Stages (WKSPMAT), 10-14 November 2008, Mazara  
790 Del Vallo, Italy.  
791
- 792 Keinänen M, Käkälä R, Ritvanen T, Myllylä T, Pönni J, Vuorinen, PJ (2017) Fatty acid  
793 composition of sprat (*Sprattus sprattus*) and herring (*Clupea harengus*) in the  
794 Baltic Sea as potential prey for salmon (*Salmo salar*). *Helgol Mar Res* 71, 4.  
795 <https://doi.org/10.1186/s10152-017-0484-0>  
796
- 797 Leblanc K, Queguiner B, Garcia N, Rimmelin P, and Raimbault P (2003) Silicon cycle  
798 in the NW Mediterranean Sea: seasonal study of a coastal oligotrophic site,  
799 *Oceanol. Acta*, 26:339–355  
800
- 801 Le Bourg B, Banaru D, Saraux C, Nowaczyk A, Le Luherne E, Jadaud A, Bigot JL,  
802 Richard P (2015) Trophic niche overlap of sprat and commercial small pelagic  
803 teleosts in the Gulf of Lions (NW Mediterranean Sea). *J Sea Res* 103:138–146  
804
- 805 Litzow MA, Bailey KM, Prahl FG, Heintz R (2006) Climate regime shifts and  
806 reorganization of fish communities: the essential fatty acid limitation hypothesis.  
807 *Mar Ecol Prog Ser* 315:1–11  
808
- 809 Lloret J, Faliex E, Shulman GE, Raga JA, Sasal P, Muñoz M, Casadevall M, Ahuir-  
810 Baraja AE, Montero FE, Repullés-Albelda A, Cardinale M, Rätz HJ, Vila S &  
811 Ferrer D (2012) Fish Health and Fisheries, Implications for Stock Assessment  
812 and Management: The Mediterranean Example. *Rev Fish Sci* 20:3:165-180  
813
- 814 Lloret J, Shulman G, and Love RM (2014) Condition and Health Indicators of Exploited  
815 Marine Fishes. Oxford: John Wiley & Sons.  
816
- 817 McBride RS, Somarakis S, Fitzhugh GR, Albert A, Yaragina NA, Wuenschel MJ,  
818 Alonso-Fernández A, Basilone G (2015) Energy acquisition and allocation to egg  
819 production in relation to fish reproductive strategies. *Fish Fish* 16:23–57  
820
- 821 Mladineo I, Šimat V, Miletić J, Beck R, Poljak V (2012) Molecular identification and  
822 population dynamic of *Anisakis pegreffii* (Nematoda: Anisakidae Dujardin, 1845)  
823 isolated from the European anchovy (*Engraulis encrasicolus* L.) in the Adriatic  
824 Sea. *Int J Food Microbiol* 157(2):224–229.  
825
- 826 Oksuz A, Ozyilmaz A. and Turan C (2009) Comparative Study on Fatty Acid Profiles of  
827 Anchovy from Black Sea and Mediterranean Sea (*Engraulis encrasicolus* L.,  
828 1758). *Chem Asian J* 21(4):3081-3086  
829
- 830 Palomera I (1992) Spawning of anchovy *Engraulis encrasicolus* in the Northwestern  
831 Mediterranean relative to hydrographic features in the region. *Mar Ecol Prog Ser*  
832 79:215-223  
833

- 834 Palomera I, Olivar MP (1996) Nearshore ichthyoplankton off the Costa Brava  
835 (Northwest Mediterranean). *Bol Inst Esp Oceanogr* 22:71–76  
836
- 837 Pethybridge H, Bodin N, Arsenault-Pernet EJ, Bourdeix JH, Brisset B, Bigot JL, Roos  
838 D, Peter M (2014) Temporal and inter-specific variations in forage fish feeding  
839 conditions in the NW Mediterranean: lipid content and fatty acid compositional  
840 changes. *Mar Ecol Prog Ser* 512:39–54  
841
- 842 Plounevez S, Champalbert G (2000) Diet, feeding behaviour and trophic activity of the  
843 anchovy (*Engraulis encrasicolus* L.) in the Gulf of Lions (Mediterranean Sea).  
844 *Oceanol Acta* 23:175–192  
845
- 846 Queiros Q, Fromentin J-M, Gasset E, Dutto G, Huiban C, Metral L, Leclerc L, Schull Q,  
847 McKenzie DJ and Saraux C (2019) Food in the Sea: Size Also Matters for Pelagic  
848 Fish. *Front Mar Sci* 6:385. [https://doi: 10.3389/fmars.2019.00385](https://doi.org/10.3389/fmars.2019.00385)  
849
- 850 Rello FJ, Adroher F & Valero A (2008) *Hysterothylacium aduncum*, the only anisakid  
851 parasite of sardines (*Sardina pilchardus*) from the southern and eastern coasts of  
852 Spain. *Parasitol Res* 104:117–121  
853
- 854 Rello FJ, Adroher FJ, Benítez R, Valero A. 2009. The fishing area as a *possible indicator*  
855 *of the infection by anisakids in anchovies (Engraulis encrasicolus)* from  
856 southwestern Europe. *Int J Food Microbiol* 129:277–281  
857
- 858 Røjbek MC, Jacobsen C, Tomkiewicz J, Støttrup JG (2012) Linking lipid dynamics with  
859 the reproductive cycle in Baltic cod *Gadus morhua*. *Mar Ecol Prog Ser* 471:215–  
860 234. [https://doi: 10.3354/meps10012](https://doi.org/10.3354/meps10012)  
861
- 862 Roncarati A, Brambilla G, Meluzzi A, Lamiceli AL, Fanelli R, Moret I, Ubaldi A,  
863 Miniero R, Sirri F, Melotti P, Domenico A (2012) Fatty acid profile and  
864 proximate composition of fillets from *Engraulis encrasicolus*, *Mullus barbatus*,  
865 *Merluccius merluccius* and *Sarda sarda* caught in Tyrrhenian, Adriatic and  
866 Ionian seas. *J Appl Ichthyol* 1–8  
867
- 868 Saraux C, Fromentin JM, Bigot JL, Bourdeix JH, Morfin M, Roos D, Van Beveren E,  
869 Bez N (2014) Spatial structure and distribution of small pelagic fish in the  
870 NorthWestern Mediterranean Sea. *PLoS One* 9 (11), e111211  
871
- 872 Saraux C, Van Bereven E, Brosset P, Queiros Q, Bourdeix JH, Dutto G, Gasset E, Jac C,  
873 Bonhommeau S, Fromentin M (2019) Small pelagic fish dynamics: A review of  
874 mechanisms in the Gulf of Lions. *Deep-Sea Res Part II*: 52–61  
875
- 876 Serrat A, Lloret J, Frigola-Tepe X, Muñoz M (2019) Trade-offs between life-history  
877 traits in a coldwater fish in the Mediterranean Sea: the case of blue whiting  
878 *Micromesistius poutassou*. *J Fish Biol.* 2019;1–16.  
879 <https://doi.org/10.1111/jfb.13993>  
880
- 881 Servei de Veterinària de Salut Pública (2007). Programa de vigilància i control del grau  
882 d'infestació per nematodes de la família anisakidae en peixos procedents de la

- 883 costa catalana. D.G. Public Health, Autonomous Gvt of Catalonia. 29 pp (in  
884 Catalan language)  
885
- 886 Shchepkina AM (1985) The influence of helminths on the tissue lipid content of Black  
887 Sea anchovy, *Engraulis encrasicolus ponticus*, and bullhead, *Neogobius*  
888 *melanostomus*, during the annual cycle. In Hargis WJ, eds, Parasitology and  
889 Pathology of Marine Organisms of the World Ocean. NOAA Technical Report  
890 NMFS25. National Oceanic and Atmospheric Administration (NOAA),  
891 Springfield, USA, pp 49–51.  
892
- 893 Shulman GE, Nikolsky VN, Yuneva TV, Minyuk GS, Shchepkin VY, Shchepkina, AM,  
894 Ivleva EV, Yunev OA, Dobrovlov IS, Bingel F, Kideys, AE (2005) Fat content  
895 in Black Sea sprat as an indicator of fish food supply and ecosystem condition.  
896 *Mar Ecol Prog Ser* 293:201-212. <https://doi:10.3354/meps293201>  
897
- 898 Somarakis S (2004) Marked interannual differences in reproductive parameters and daily  
899 egg production of anchovy (*Engraulis encrasicolus*) in the northern Aegean Sea.  
900 *Belg J Zool* 135(2):247-252  
901
- 902 St John MA & Lund T (1996) Lipid biomarkers: linking the utilization of frontal plankton  
903 biomass to enhanced condition of juvenile North Sea cod. *Mar Ecol Prog Ser*  
904 131:75–85  
905
- 906 Scientific, Technical and Economic Committee for Fisheries (STECF) (2017) Evaluation  
907 of alternative scenarios for Adriatic small pelagic MAP (STECF-OWP-18-02).  
908 Publications Office of the European Union, Luxembourg, ISBN 978-92-79-  
909 85803-1, doi:10.2760/89084, JRC111685  
910
- 911 Thiébaud S, Moatti JP, AllEnvi (2016). The Mediterranean region under climate change:  
912 a scientific update. Marseille (France): IRD Editions. 732 p.  
913
- 914 Tocher DR (2003) Metabolism and functions of lipids and fatty acids in teleost fish. *Rev*  
915 *Fish Sci* 11:107–184  
916
- 917 Van Beveren E, Bonhommeau S, Fromentin JM, Bigot JL, Bourdeix JH, Brosset P, Roos  
918 D, Saraux, C (2014) Rapid changes in growth, condition, size and age of small  
919 pelagic fish in the Mediterranean. *Mar Biol* 161:1809–1822  
920
- 921 Van Beveren E, Keck N, Fromentin JM, Laurence S, Boulet H, Labrut S, Baud M,  
922 Bigarré L, Brosset P, Bonhommeau S, Saraux C (2016) Can pathogens alter the  
923 population dynamics of sardine in the NW Mediterranean? *Mar Biol* 163(12):240  
924
- 925 Veron M, Duhamel E, Bertignac M, Pawlowski L, Huret M (2020) Major changes in  
926 sardine growth and body condition in the Bay of Biscay between 2003 and 2016:  
927 Temporal trends and drivers. *Progr Oceanogr* 182, 102274  
928
- 929 Wasmund N (2017) TheDiatom/Dinoflagellate Index as anIndicator of Ecosystem  
930 Changes in the Baltic Sea. 2. Historical Data for Use in Determination of Good  
931 Environmental Status. *Front Mar Sci* 4:153  
932

- 933 Zarubin M, Farstey V, Wold A, Falk-Petersen S, Genin A (2014) Intraspecific  
934 differences in lipid content of calanoid copepods across fine-scale depth ranges  
935 within the photic layer. PLoS ONE 9, e92935. [https://doi:](https://doi.org/10.1371/journal.pone.0092935)  
936 [10.1371/journal.pone.0092935](https://doi.org/10.1371/journal.pone.0092935)  
937
- 938 Zorica B, Vilibić I, Keč VČ, Šepić J (2013) Environmental conditions conducive to  
939 anchovy (*Engraulis encrasicolus*) spawning in the Adriatic Sea: Anchovy  
940 spawning and environmental conditions. Fish Oceanogr 22:32–40.  
941 <https://doi.org/10.1111/fog.12002>  
942
- 943 Zorica B, Čikes Kec, V., Vidjak, O., Mladinfeo, I., Ezgeta, Balic, D (2016) Feeding  
944 habits and helminth parasites of sardine (*S. pilchardus*) and anchovy (*E.*  
945 *encrasicolus*) in the Adriatic Sea. Medit Mar Sci 17/1:216-229  
946

947 **Tables**

948

949 Table 1. Total fat (% wet weight) and fatty acid profiles (% of total fatty acids) in the muscle of  
950 spawning and non-spawning sardine and anchovy (1)

|                 | Sardine      |              |      | Anchovy      |              |      |
|-----------------|--------------|--------------|------|--------------|--------------|------|
|                 | Non-spawning | Spawning     | Sig. | Non-spawning | Spawning     | Sig. |
| Total fat       | 5.86 ± 2.14  | 1.78 ± 1.05  | ***  | 0.89 ± 0.63  | 2.46 ± 1.49  | **   |
| C14:0           | 7.41 ± 0.90  | 8.07 ± 1.00  | ns   | 6.90 ± 2.25  | 6.23 ± 1.74  | ns   |
| C16:0 (P)       | 23.75 ± 1.63 | 29.49 ± 7.35 | **   | 28.89 ± 6.41 | 21.39 ± 3.50 | **   |
| C17:0           | 0.91 ± 0.16  | 1.44 ± 0.34  | ***  | 1.37 ± 0.32  | 0.66 ± 0.44  | ***  |
| C18:0           | 4.45 ± 0.63  | 6.59 ± 1.55  | ***  | 5.68 ± 1.13  | 2.93 ± 1.42  | ***  |
| C20:0           | 0.32 ± 0.12  | 0.43 ± 0.27  | ns   | 0.24 ± 0.31  | 2.14 ± 1.22  | ***  |
| C22:0           | 0.15 ± 0.09  | 0.16 ± 0.10  | ns   | 0.08 ± 0.10  | 0.04 ± 0.09  | ns   |
| C24:0           | 0.45 ± 0.45  | 0.15 ± 0.10  | *    | 0.34 ± 0.68  | 0.12 ± 0.33  | ns   |
| Total SFA       | 37.49 ± 2.03 | 46.33 ± 8.76 | ***  | 43.50 ± 8.50 | 33.52 ± 5.68 | **   |
| C16:1 n-7 (PO)  | 5.59 ± 1.10  | 4.99 ± 1.24  | ns   | 4.30 ± 1.33  | 3.84 ± 2.11  | ns   |
| C18:1 n-9       | 14.11 ± 1.37 | 12.66 ± 1.65 | *    | 11.92 ± 1.73 | 9.69 ± 2.06  | *    |
| C20:1 n-9       | 3.57 ± 1.19  | 2.45 ± 1.97  | ns   | 0.82 ± 0.95  | 1.52 ± 1.05  | ns   |
| C22:1 n-9       | 0.22 ± 0.21  | 0.23 ± 0.21  | ns   | 0.10 ± 0.17  | 0.53 ± 0.22  | ***  |
| Total MUFA      | 23.61 ± 2.23 | 20.33 ± 4.48 | *    | 17.15 ± 2.87 | 15.59 ± 4.63 | ns   |
| C18:3 n-3       | 1.95 ± 0.64  | 1.40 ± 0.16  | *    | 1.07 ± 0.80  | 1.37 ± 0.86  | ns   |
| C20:5 n-3 (EPA) | 10.91 ± 0.99 | 7.88 ± 1.42  | ***  | 9.02 ± 1.58  | 14.13 ± 2.61 | ***  |
| C22:6 n-3 (DHA) | 22.88 ± 2.38 | 20.86 ± 4.17 | ns   | 25.24 ± 6.75 | 32.02 ± 7.46 | *    |
| Total n-3 PUFA  | 35.75 ± 2.70 | 30.13 ± 5.42 | **   | 35.31 ± 8.01 | 47.53 ± 8.64 | **   |
| C18:2 n-6       | 2.26 ± 0.26  | 1.96 ± 0.12  | **   | 1.92 ± 0.50  | 2.43 ± 0.33  | *    |
| C20:4 n-6       | 0.89 ± 0.21  | 1.22 ± 0.77  | ns   | 2.12 ± 1.21  | 0.97 ± 0.15  | *    |
| Total n-6 PUFA  | 3.13 ± 0.18  | 3.19 ± 0.75  | ns   | 4.03 ± 1.36  | 3.37 ± 0.46  | ns   |
| Total PUFA      | 38.88 ± 2.75 | 33.32 ± 5.82 | **   | 39.34 ± 8.59 | 50.90 ± 8.89 | **   |
| PO/P            | 0.24 ± 0.05  | 0.18 ± 0.07  | *    | 0.15 ± 0.05  | 0.18 ± 0.09  | ns   |
| EPA/DHA         | 0.48 ± 0.07  | 0.38 ± 0.04  | ***  | 0.38 ± 0.09  | 0.45 ± 0.11  | ns   |

951 (1) Pairs of means corresponding to spawning and non-spawning fish were compared and those that  
952 were significantly different are identified with the symbols \*\*\*, \*\* and \*, showing significance  
953 levels of  $P < 0.001$ ,  $P < 0.01$  and  $P < 0.05$ , respectively. ns means not significant. Values in this  
954 table correspond to means ± standard deviation.

955

956

957  
 958  
 959 Table 2. Total fat (% wet weight) and fatty acid profiles (% of total fatty acids) during non-  
 960 spawning periods for *Sardina pilchardus* in the Eastern Algarve waters of the Atlantic Ocean,  
 961 (Bandarra et al. 2017); the Mediterranean waters of the Adriatic Sea (De Leonardis and Macciola  
 962 2004), the Gulf of Lion (Pethybridge et al. 2014) and the northern Catalan Sea (our study).  
 963

| Marine Areas       | Eastern Algarve<br>October 2016 | Adriatic Sea<br>January–March and<br>August–October 2002 | Gulf of Lion<br>July 2010 | <b>This study<br/>(N Catalan Sea)<br/>November-April<br/>2019-2020</b> |
|--------------------|---------------------------------|----------------------------------------------------------|---------------------------|------------------------------------------------------------------------|
| Total fat          | 14.0                            | (-)                                                      | 18.21                     | <b>5.86</b>                                                            |
| C16:0 (P)          | 19.6                            | 22.3                                                     | (-)                       | <b>23.75</b>                                                           |
| C16:1 n-7 (PO)     | 6.6                             | 9.2                                                      | (-)                       | <b>5.59</b>                                                            |
| <b>PO/P</b>        | 0.34                            | 0.41                                                     | (-)                       | <b>0.24</b>                                                            |
| C20:5 n-3<br>(EPA) | 13.6                            | 6.5                                                      | (-)                       | <b>10.91</b>                                                           |
| C22:6 n-3<br>(DHA) | 14.8                            | 11.3                                                     | (-)                       | <b>22.88</b>                                                           |
| <b>EPA/DHA</b>     | 0.92                            | 0.57                                                     | (-)                       | <b>0.48</b>                                                            |

964  
 965 (-) means no data available.  
 966  
 967  
 968  
 969  
 970  
 971  
 972  
 973  
 974  
 975  
 976  
 977  
 978  
 979  
 980  
 981  
 982  
 983  
 984  
 985  
 986  
 987  
 988

989 Table 3. Total fat (% wet weight) and fatty acid profiles (% of total fatty acids) during non-spawning periods for *Engraulis*  
 990 *encrasicolus* in the Mediterranean Sea (Eastern Mediterranean, Black Sea, Oksuz et al. 2009; Tyrrhenian Sea, Adriatic Sea and Ionian  
 991 Sea, Roncarati et al. 2012; Gulf of Lion, Pethybridge et al. 2014 and northern Catalan Sea (our study).  
 992  
 993

| Marine Areas       | Eastern<br>Medit.<br>December<br>2007 | Black Sea<br>January 2009 | Tyrrhenian Sea<br>May 2007-2008<br>November 2007 | Adriatic Sea<br>May 2007-2008<br>November 2007 | Ionian Sea<br>May 2007-2008<br>November 2007 | Gulf of Lion<br>March 2011 | <b>This study<br/>(N Catalan Sea)<br/>December-June<br/>2019-2020</b> |
|--------------------|---------------------------------------|---------------------------|--------------------------------------------------|------------------------------------------------|----------------------------------------------|----------------------------|-----------------------------------------------------------------------|
| Total fat          | (-)                                   | 8.85                      | 2.27                                             | 1.81                                           | 1.91                                         | 8.19                       | <b>0.89</b>                                                           |
| C16:0 (P)          | 22.13                                 | 17.35                     | 23.66                                            | 23.27                                          | 21.94                                        | (-)                        | <b>28.89</b>                                                          |
| C16:1 n-7 (PO)     | 2.61                                  | 7.93                      | 2.95                                             | 3.17                                           | 3.71                                         | (-)                        | <b>4.30</b>                                                           |
| <b>PO/P</b>        | 0.12                                  | 0.46                      | 0.12                                             | 0.14                                           | 0.17                                         | (-)                        | <b>0.15</b>                                                           |
| C20:5 n-3<br>(EPA) | 5.65                                  | 10.92                     | 6.13                                             | 6.25                                           | 6.49                                         | (-)                        | <b>9.02</b>                                                           |
| C22:6 n-3<br>(DHA) | 33.4                                  | 15.29                     | 28.06                                            | 27.16                                          | 25.28                                        | (-)                        | <b>25.24</b>                                                          |
| <b>EPA/DHA</b>     | 0.17                                  | 0.71                      | 0.22                                             | 0.23                                           | 0.26                                         | (-)                        | <b>0.36</b>                                                           |

994  
 995 (-) means no data available  
 996  
 997  
 998  
 999

1000  
 1001  
 1002  
 1003

1004 **Figures**

1005  
1006  
1007  
1008  
1009  
1010  
1011  
1012

1013  
1014  
1015  
1016  
1017  
1018  
1019  
1020  
1021  
1022

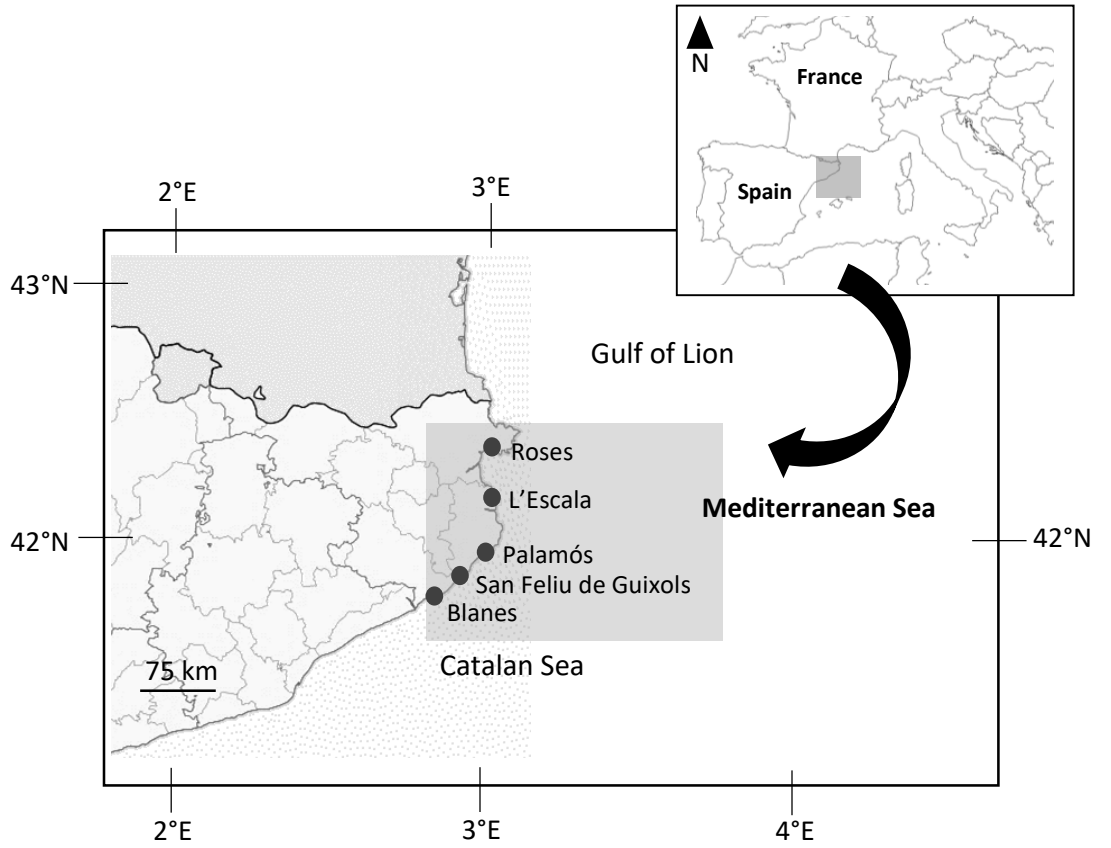

1023  
1024  
1025  
1026  
1027  
1028  
1029  
1030  
1031  
1032  
1033  
1034  
1035  
1036  
1037  
1038  
1039  
1040  
1041  
1042  
1043

Figure 1. Map of the fishing ports in the northern Catalan Sea (NW Mediterranean) where samples of sardines and anchovies were taken



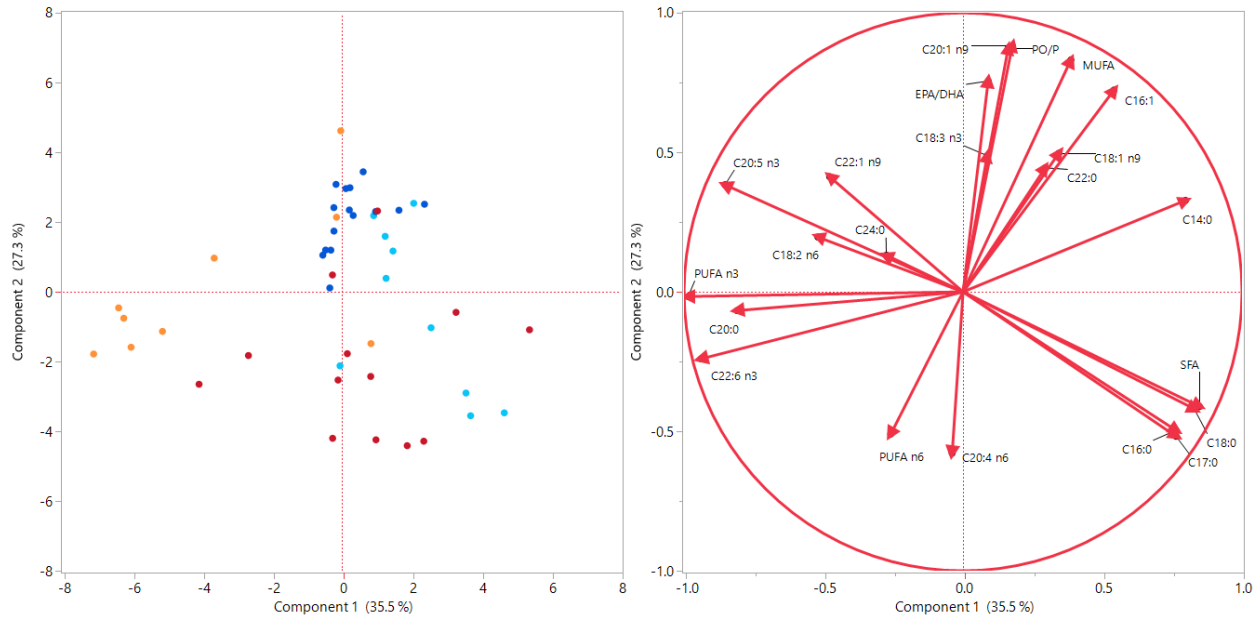

1044  
 1045  
 1046  
 1047  
 1048

Figure 2. Plots of scores (non-spawning sardine = dark blue; spawning sardine = light blue; non-spawning anchovy = red; spawning anchovy = orange) and loadings of the Principal Component Analysis of fish species fatty acid composition.
